# Supplementary material for: Differential aging of growth plate cartilage underlies differences in bone length and thus helps determine skeletal proportions
Source: PLoS Biol. 2018 Jul 23;16(7):e2005263. doi: 10.1371/journal.pbio.2005263 (PMC6056026; doi:10.1371/journal.pbio.2005263)
Supplement: S9 Table — Selection criteria, p < 0.05 by Fisher’s exact test. PZ, proliferative zone. (XLSX) [file pbio.2005263.s017.xlsx]

## Sheet: S9
Ingenuity Canonical Pathways	P-value	Molecules
Role of Osteoblasts, Osteoclasts and Chondrocytes in Rheumatoid Arthritis	1.07152e-05	SPP1,WIF1,CSF1,DKK3,PIK3R1,WNT4,NFATC2,ADAMTS5,ALPL,ADAMTS4
Role of Macrophages, Fibroblasts and Endothelial Cells in Rheumatoid Arthritis	0.00057544	WIF1,CSF1,DKK3,PIK3R1,WNT4,NFATC2,TLR3,CREB5,ADAMTS4
Wnt/β-catenin Signaling	0.00177828	WIF1,CDH5,DKK3,TLE4,CD44,WNT4
Virus Entry via Endocytic Pathways	0.0074131	B2M,ITGB2,CD55,PIK3R1
IGF-1 Signaling	0.00851138	IGFBP4,PIK3R1,IGFBP5,SOCS5
Phospholipase C Signaling	0.00977237	FCER1G,NFATC2,RHOJ,ARHGEF2,CREB5,LCP2
Role of Tissue Factor in Cancer	0.0138038	ARRB1,CSF1,PIK3R1,EGR1
Sphingosine-1-phosphate Signaling	0.0141254	PIK3R1,CASP4,RHOJ,PDGFRB
Regulation of the Epithelial-Mesenchymal Transition Pathway	0.0144544	FOXC2,PIK3R1,EGR1,WNT4,PDGFRB
Glioma Invasiveness Signaling	0.0158489	PIK3R1,CD44,RHOJ
STAT3 Pathway	0.0177828	KDR,SOCS5,PDGFRB
Ovarian Cancer Signaling	0.0234423	ARRB1,PIK3R1,CD44,WNT4
Glioblastoma Multiforme Signaling	0.0323594	PIK3R1,WNT4,RHOJ,PDGFRB
Colorectal Cancer Metastasis Signaling	0.0389045	ARRB1,PIK3R1,WNT4,RHOJ,TLR3
PAK Signaling	0.040738	PIK3R1,EPHA3,PDGFRB
RhoGDI Signaling	0.0416869	CDH5,CD44,RHOJ,ARHGEF2
Chronic Myeloid Leukemia Signaling	0.0436516	GAB2,MECOM,PIK3R1
Hematopoiesis from Pluripotent Stem Cells	0.0489779	CSF1,FCER1G
